# Supplementary material for: Development and Validation of a Stable Isotope Dilution Headspace–SPME–GC/MS Method for the Determination of Vanillin in Fragrant Vegetable Oils
Source: MDPI journal article supplement (doi:10.3390/molecules28217288), 2023-10-26
Supplement: s1 [file s1]

## **Supplementary Information**

### **Contents:**

**Figure S1. 3D surface plot from Plackett-Burman design**

**Figure S2. The ramps from Plackett-Burman design**

**Table S1. Detailed information of fragrant vegetable oils used in this study**

**Table S2. PB experimental design and summary of results**

**Table S3. CCD experimental design and summary of results**

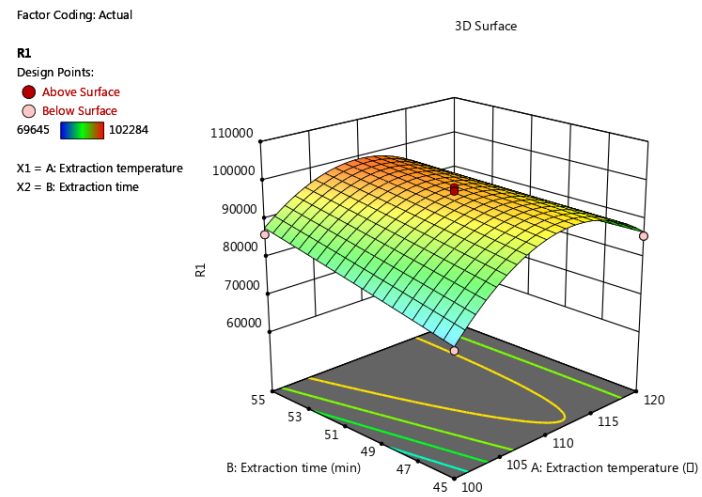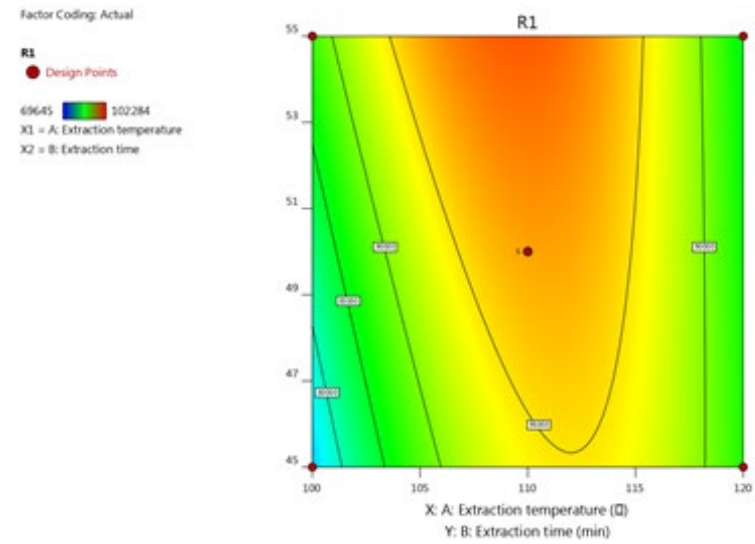

**Figure S1.** 3D surface plot from Plackett-Burman design.

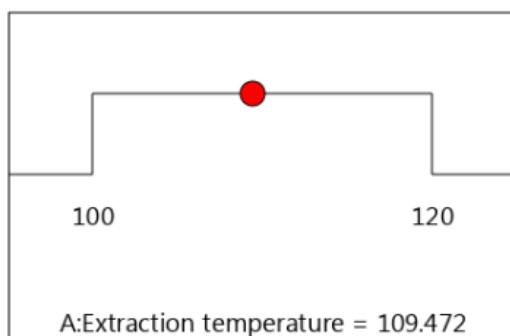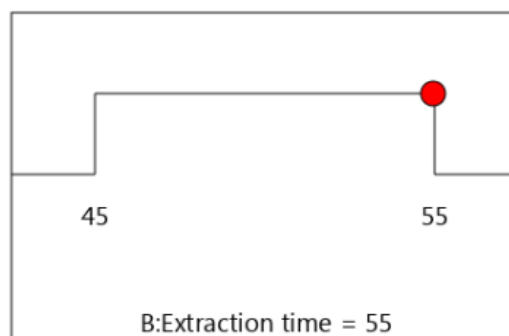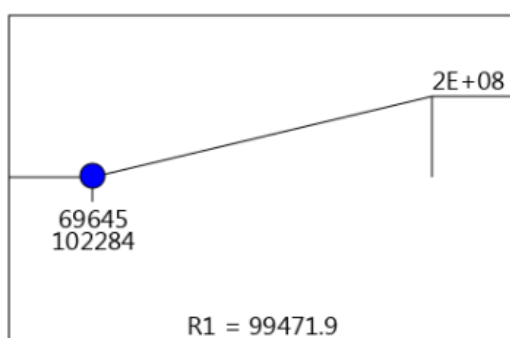

Desirability = 0.000  
Solution 1 out of 9

**Figure S2.** The ramps from Plackett-Burman design.

**Table S1.** Detailed information of fragrant vegetable oils used in this study.

| Vegetable Oils | Producer origin | Technology         | Vanillin ( $\mu\text{g/kg}$ ) |
|----------------|-----------------|--------------------|-------------------------------|
| Sesame oil 1   | Shandong, China | Hot Pressed        | 963.7                         |
| Sesame oil 2   | Shandong, China | Hot Pressed        | 978.0                         |
| Sesame oil 3   | Shandong, China | Hot Pressed        | 776.8                         |
| Sesame oil 4   | Hubei, China    | Hot Pressed        | 865.7                         |
| Sesame oil 5   | Shandong, China | Hot Pressed        | 930.1                         |
| Sesame oil 6   | Henan, China    | Hot Pressed        | 1066.9                        |
| Sesame oil 7   | Anhui, China    | Hot Pressed        | 757.2                         |
| Sesame oil 8   | Anhui, China    | Hot Pressed        | 710.3                         |
| Sesame oil 9   | Anhui, China    | Hot Pressed        | 636.3                         |
| Sesame oil 10  | Hunan, China    | Hot Pressed        | 1479.4                        |
| Sesame oil 11  | Shandong, China | Hot Pressed        | 1173.7                        |
| Sesame oil 12  | Shandong, China | Hot Pressed        | 858.3                         |
| Sesame oil 13  | Beijing, China  | Hot Pressed        | 526.7                         |
| Sesame oil 14  | Shandong, China | Hot Pressed        | 943.2                         |
| Sesame oil 15  | Shandong, China | Hot Pressed        | 900.8                         |
| Sesame oil 16  | Shandong, China | Hot Pressed        | 757.3                         |
| Sesame oil 17  | Shandong, China | Hot Pressed        | 710.0                         |
| Sesame oil 18  | Shandong, China | Hot Pressed        | 978.0                         |
| Sesame oil 19  | Shandong, China | Hot Pressed        | 778.3                         |
| Sesame oil 20  | Shandong, China | Hot Pressed        | 866.4                         |
| Sesame oil 21  | Hebei, China    | Hot Pressed        | 777.2                         |
| Sesame oil 22  | Hebei, China    | Hot Pressed        | 866.5                         |
| Sesame oil 23  | Anhui, China    | Hot Pressed        | 398.0                         |
| Sesame oil 24  | Tianjin, China  | Hot Pressed        | 666.3                         |
| Sesame oil 25  | Tianjin, China  | Hot Pressed        | 610.4                         |
| Sesame oil 26  | Shandong, China | Hot Pressed        | 654.0                         |
| Sesame oil 27  | Anhui, China    | Hot Pressed        | 1113.3                        |
| Sesame oil 28  | Shandong, China | Aqueous extraction | 879.0                         |
| Sesame oil 29  | Shandong, China | Aqueous extraction | 798.2                         |
| Sesame oil 30  | Shandong, China | Aqueous extraction | 754.3                         |
| Sesame oil 31  | Shandong, China | Aqueous extraction | 892.0                         |
| Sesame oil 32  | Shandong, China | Aqueous extraction | 1010.0                        |
| Sesame oil 33  | Shandong, China | Aqueous extraction | 1050.2                        |
| Sesame oil 34  | Shandong, China | Aqueous extraction | 879.0                         |
| Sesame oil 35  | Shandong, China | Aqueous extraction | 754.0                         |
| Sesame oil 36  | Shandong, China | Aqueous extraction | 579.3                         |

|                 |                  |                    |                |
|-----------------|------------------|--------------------|----------------|
| Sesame oil 37   | Shandong,China   | Aqueous extraction | 620.1          |
| Sesame oil 38   | Henan, China     | Aqueous extraction | 801.8          |
| Sesame oil 39   | Chongqing, China | Aqueous extraction | 1051.0         |
| Sesame oil 40   | Henan, China     | Aqueous extraction | 892.0          |
| Rapeseed oil 1  | Sichuan,China    | Hot Pressed        | 297.7          |
| Rapeseed oil 2  | Sichuan,China    | Hot Pressed        | 593.7          |
| Rapeseed oil 3  | Sichuan,China    | Hot Pressed        | 429.0          |
| Rapeseed oil 4  | Sichuan,China    | Hot Pressed        | 229.0          |
| Rapeseed oil 5  | Jiangsu, China   | Hot Pressed        | 193.3          |
| Rapeseed oil 6  | Jiangsu, China   | Hot Pressed        | 492.0          |
| Rapeseed oil 7  | Shanxi, China    | Hot Pressed        | 54.3           |
| Rapeseed oil 8  | Sichuan,China    | Hot Pressed        | 577.0          |
| Rapeseed oil 9  | Chongqing, China | Hot Pressed        | 157.7          |
| Rapeseed oil 10 | Jiangsu, China   | Hot Pressed        | 403.2          |
| Rapeseed oil 11 | Hubei,China      | Hot Pressed        | 133.5          |
| Rapeseed oil 12 | Tianjin,China    | Hot Pressed        | 113.4          |
| Rapeseed oil 13 | Neimeng,China    | Hot Pressed        | - <sup>a</sup> |
| Rapeseed oil 14 | Shanxi,China     | Hot Pressed        | 65.8           |
| Rapeseed oil 15 | Fujian, China    | Hot Pressed        | 89.3           |
| Rapeseed oil 16 | Chongqing, China | Hot Pressed        | 118.4          |
| Rapeseed oil 17 | Chongqing,China  | Hot Pressed        | 140.0          |
| Rapeseed oil 18 | Shanghai, China  | Hot Pressed        | -              |
| Rapeseed oil 19 | Chongqing, China | Hot Pressed        | 583.3          |
| Rapeseed oil 20 | Sichuan, China   | Hot Pressed        | 570.0          |
| Peanut oil 1    | Shandong, China  | Hot Pressed        | 94.3           |
| Peanut oil 2    | Shandong, China  | Hot Pressed        | 104.2          |
| Peanut oil 3    | Shandong, China  | Hot Pressed        | 118.3          |
| Peanut oil 4    | Shandong, China  | Hot Pressed        | 82.0           |
| Peanut oil 5    | Shandong, China  | Hot Pressed        | 92.3           |
| Peanut oil 6    | Shandong, China  | Hot Pressed        | 99.3           |
| Peanut oil 7    | Shandong, China  | Hot Pressed        | 181.8          |
| Peanut oil 8    | Shandong, China  | Hot Pressed        | 217.0          |
| Peanut oil 9    | Shandong, China  | Hot Pressed        | 102.6          |
| Peanut oil 10   | Shandong, China  | Hot Pressed        | 118.7          |
| Peanut oil 11   | Henan, China     | Hot Pressed        | 78.0           |
| Peanut oil 12   | Shandong, China  | Hot Pressed        | 62.9           |
| Peanut oil 13   | Shandong, China  | Hot Pressed        | 95.0           |
| Peanut oil 14   | Shandong, China  | Hot Pressed        | 85.1           |

|               |                 |             |       |
|---------------|-----------------|-------------|-------|
| Peanut oil 15 | Shandong, China | Hot Pressed | 242.3 |
| Peanut oil 16 | Shandong, China | Hot Pressed | 132.7 |
| Peanut oil 17 | Shandong, China | Hot Pressed | 90.0  |
| Peanut oil 18 | Shandong, China | Hot Pressed | 93.0  |
| Peanut oil 19 | Shandong, China | Hot Pressed | 93.0  |
| Peanut oil 20 | Shandong, China | Hot Pressed | 117.3 |

---

<sup>a</sup> “—” represents below the lowest quantitation level

**Table S2.** PB experimental design and summary of results.

| Method    | Extraction<br>temperature<br>(°C) | Extraction<br>time<br>(min) | Sample<br>weight<br>(g) | Desorption<br>temperature<br>(°C) | Desorption<br>time<br>(min) | Equilibratio<br>n time<br>(min) | Average  | SD      | RSD   |
|-----------|-----------------------------------|-----------------------------|-------------------------|-----------------------------------|-----------------------------|---------------------------------|----------|---------|-------|
|           | A                                 | B                           | C                       | D                                 | E                           | F                               |          |         |       |
| <b>1</b>  | 90                                | 20                          | 7                       | 260                               | 7                           | 10                              | 15881.50 | 273.65  | 1.72  |
| <b>2</b>  | 50                                | 50                          | 7                       | 260                               | 3                           | 10                              | 2125.00  | 152.74  | 7.19  |
| <b>3</b>  | 50                                | 20                          | 3                       | 260                               | 3                           | 25                              | 607.00   | 114.55  | 18.87 |
| <b>4</b>  | 50                                | 50                          | 3                       | 260                               | 7                           | 10                              | 1151.50  | 53.03   | 4.61  |
| <b>5</b>  | 90                                | 50                          | 7                       | 240                               | 3                           | 10                              | 36868.00 | 1173.80 | 3.18  |
| <b>6</b>  | 50                                | 50                          | 7                       | 240                               | 7                           | 25                              | 1385.00  | 172.53  | 12.46 |
| <b>7</b>  | 90                                | 50                          | 3                       | 260                               | 7                           | 25                              | 34040.00 | 480.83  | 1.41  |
| <b>8</b>  | 90                                | 50                          | 3                       | 240                               | 3                           | 25                              | 31781.50 | 2553.36 | 8.03  |
| <b>9</b>  | 50                                | 20                          | 3                       | 240                               | 3                           | 10                              | 451.50   | 166.17  | 36.80 |
| <b>10</b> | 50                                | 20                          | 7                       | 240                               | 7                           | 25                              | 315.50   | 53.03   | 16.81 |
| <b>11</b> | 90                                | 20                          | 3                       | 240                               | 7                           | 10                              | 12267.00 | 360.62  | 2.94  |
| <b>12</b> | 90                                | 20                          | 7                       | 260                               | 3                           | 25                              | 16300.50 | 44.55   | 0.27  |

**Table S3.** CCD experimental design and summary of results.

| <b>Method</b> | <b>Extraction<br/>temperature<br/>(°C)</b> | <b>Extraction<br/>time<br/>(min)</b> | <b>Sample<br/>weight<br/>(g)</b> | <b>Desorption<br/>temperature<br/>(°C)</b> | <b>Desorption<br/>time<br/>(min)</b> | <b>Equilibratio<br/>n time<br/>(min)</b> | <b>Average</b> | <b>SD</b> | <b>RSD</b> |
|---------------|--------------------------------------------|--------------------------------------|----------------------------------|--------------------------------------------|--------------------------------------|------------------------------------------|----------------|-----------|------------|
|               | <b>A</b>                                   | <b>B</b>                             | <b>C</b>                         | <b>D</b>                                   | <b>E</b>                             | <b>F</b>                                 |                |           |            |
| <b>1</b>      | 95.86                                      | 55                                   | 4                                | 280                                        | 1.5                                  | 15                                       | 76539.50       | 832.26    | 1.09       |
| <b>2</b>      | 100                                        | 60                                   | 4                                | 280                                        | 1.5                                  | 15                                       | 93634.00       | 2153.85   | 2.30       |
| <b>3</b>      | 100                                        | 50                                   | 4                                | 280                                        | 1.5                                  | 15                                       | 83357.00       | 2008.18   | 2.41       |
| <b>4</b>      | 110                                        | 55                                   | 4                                | 280                                        | 1.5                                  | 15                                       | 98792.50       | 2532.15   | 2.56       |
| <b>5</b>      | 110                                        | 55                                   | 4                                | 280                                        | 1.5                                  | 15                                       | 100595.50      | 290.62    | 0.29       |
| <b>6</b>      | 110                                        | 55                                   | 4                                | 280                                        | 1.5                                  | 15                                       | 98550.00       | 4000.81   | 4.06       |
| <b>7</b>      | 110                                        | 48                                   | 4                                | 280                                        | 1.5                                  | 15                                       | 99516.00       | 516.19    | 0.52       |
| <b>8</b>      | 110                                        | 55                                   | 4                                | 280                                        | 1.5                                  | 15                                       | 99346.50       | 453.26    | 0.46       |
| <b>9</b>      | 110                                        | 62                                   | 4                                | 280                                        | 1.5                                  | 15                                       | 101759.50      | 2153.14   | 2.12       |
| <b>10</b>     | 110                                        | 55                                   | 4                                | 280                                        | 1.5                                  | 15                                       | 99508.50       | 4305.57   | 4.33       |
| <b>11</b>     | 120                                        | 50                                   | 4                                | 280                                        | 1.5                                  | 15                                       | 85666.50       | 970.86    | 1.13       |
| <b>12</b>     | 120                                        | 60                                   | 4                                | 280                                        | 1.5                                  | 15                                       | 83351.50       | 1041.57   | 1.25       |
| <b>13</b>     | 124.14                                     | 55                                   | 4                                | 280                                        | 1.5                                  | 15                                       | 77122.00       | 4.24      | 0.01       |
